# Supplementary material
Source: PubMed Central journal article supplement (PMC4125397)
Supplement: 0bdca846b9bcb58645596b755c7a20ec_genetics.114.166272-6.pdf [file 0bdca846b9bcb58645596b755c7a20ec_genetics.114.166272-6.pdf]

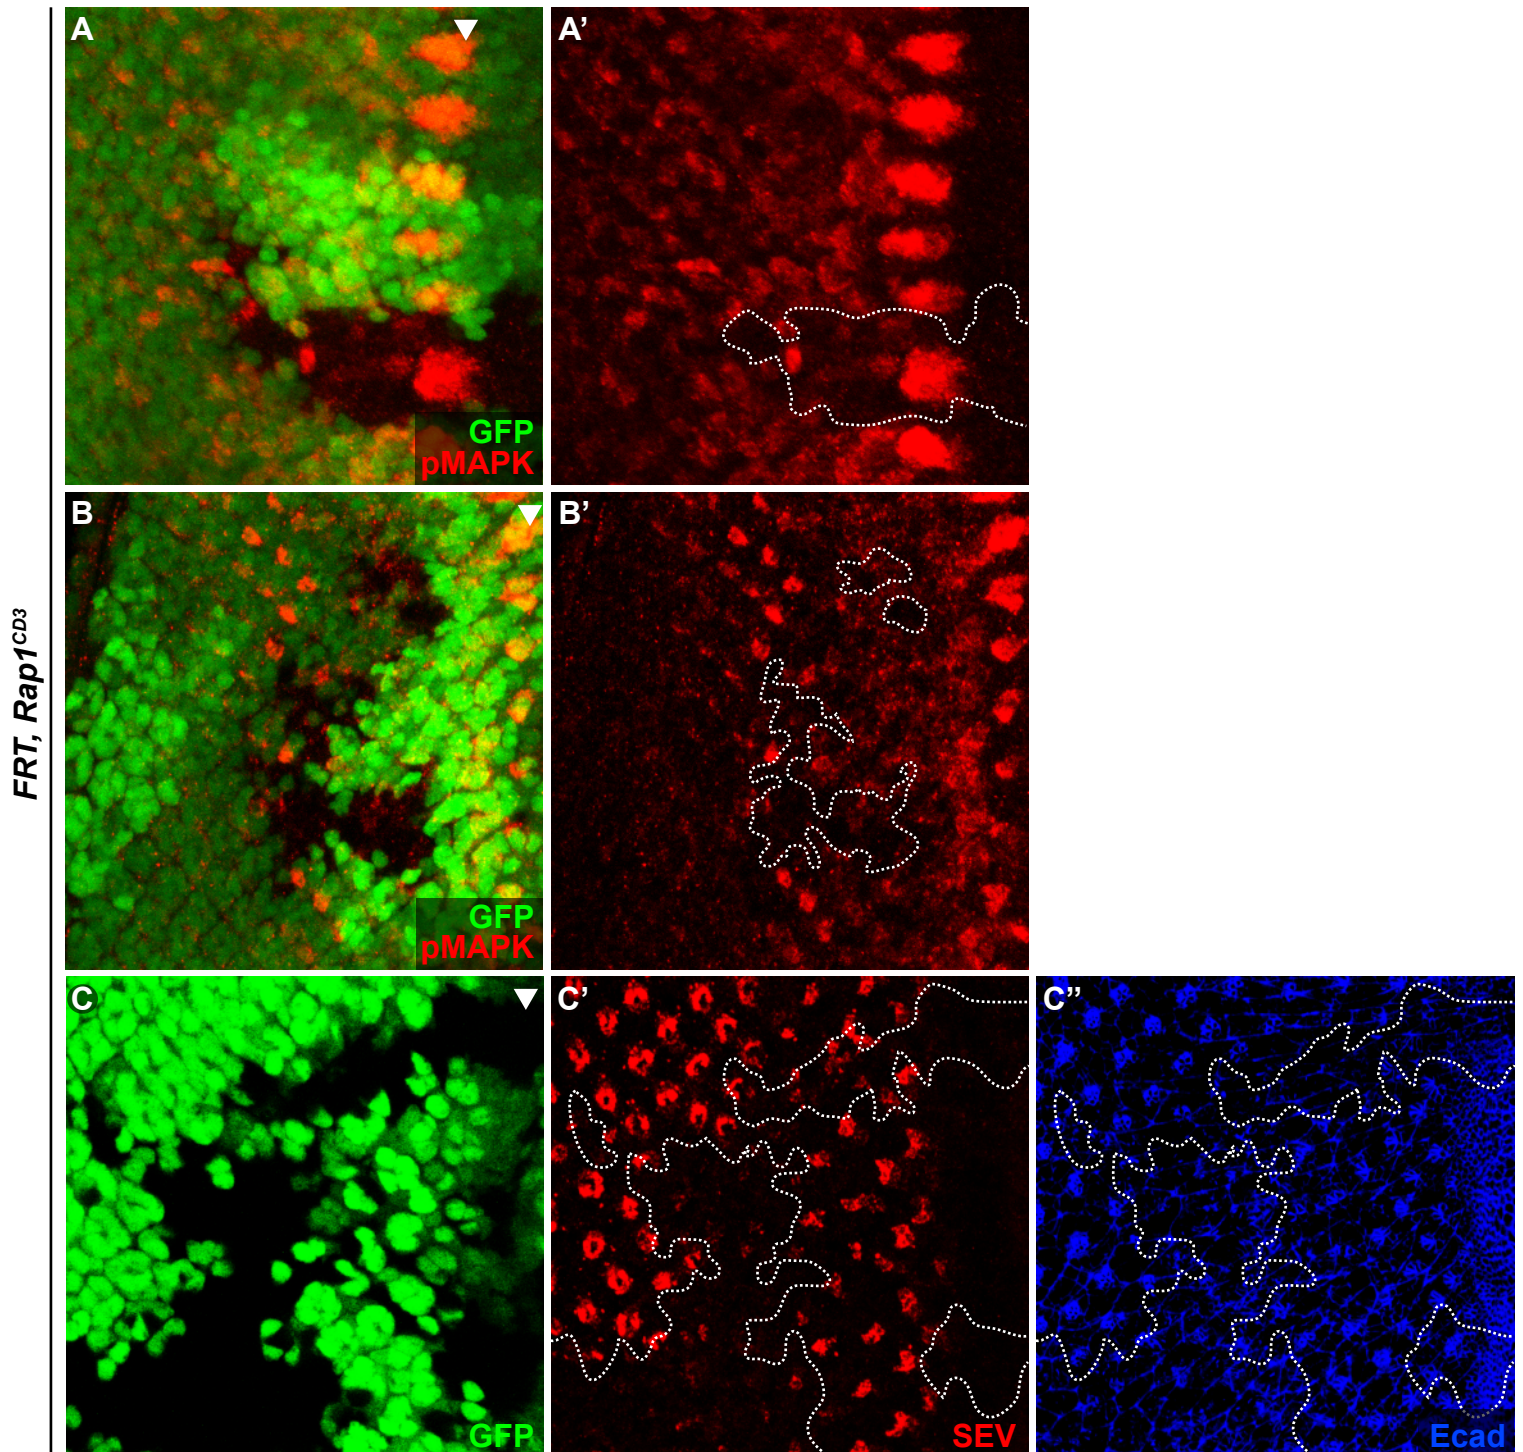

**Figure S6** Clonal analysis of *Rap1<sup>CD3</sup>* null allele confirms results obtained with *Rap1* dsRNA in third instar eye discs. (A-A' to C-C'') Random homozygous clones (GFP-negative cells) for the *Rap1<sup>CD3</sup>* allele in third instar eye discs were induced using the FLP/FRT system. Eye discs were then immunostained with (A' and B') anti-pMAPK, (C') anti-SEV and (C'') anti-Ecad antibodies. Loss of Rap1 activity does not impede pMAPK levels in cells close to the morphogenetic furrow (A'), but significantly reduces pMAPK levels in posterior areas (B') corresponding to the R7 differentiation region, wherein SEV activity is required. Arrowheads mark the position of the morphogenetic furrow. Anterior is to the right.
