# Supplementary material
Source: PubMed Central journal article supplement (PMC4125397)
Supplement: 3b6b6fe937a9d64818bbf4828721aeae_genetics.114.166272-5.pdf [file 3b6b6fe937a9d64818bbf4828721aeae_genetics.114.166272-5.pdf]

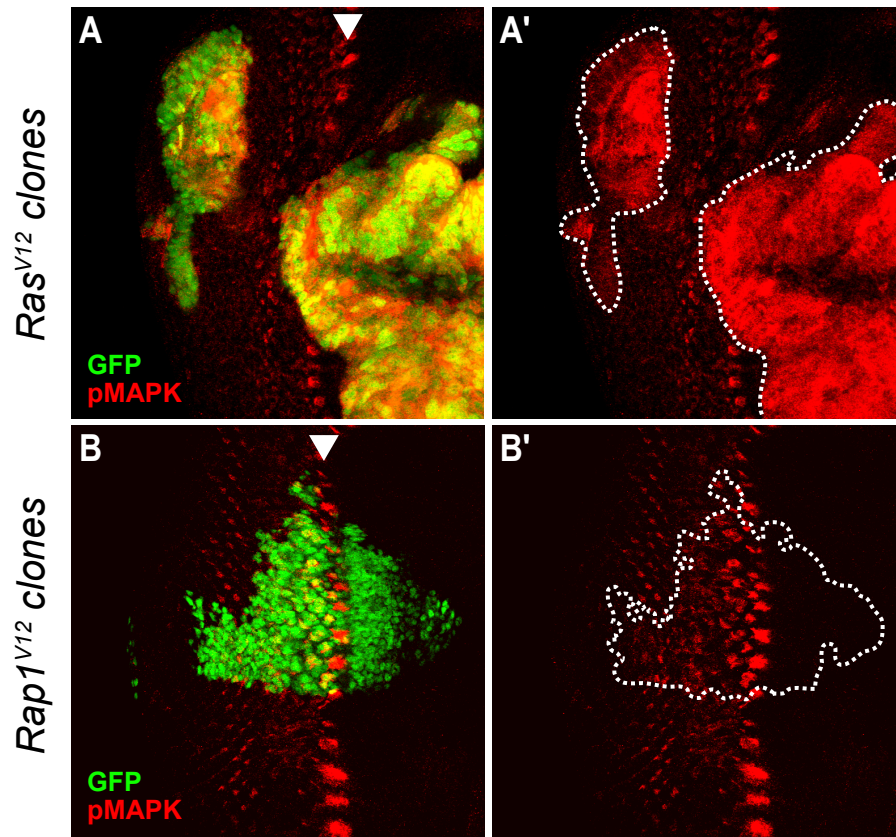

**Figure S2** Unlike *Ras<sup>V12</sup>*, clonal overexpression of *Rap1<sup>V12</sup>* during eye development does not promote ectopic activation of MAPK (pMAPK). (A-A') *UAS-Ras<sup>V12</sup>* and (B-B') *UAS-Rap1<sup>V12</sup>* were clonally expressed in third instar eye discs and visualized using the FLP-out / Gal4 system (GFP-positive cells). The arrowhead marks the position of the morphogenetic furrow. Anterior is to the right.
