# Supplementary material
Source: PubMed Central journal article supplement (PMC4125397)
Supplement: 6d1ba82b0a71e3db1f2cda790d3fb108_genetics.114.166272-13.pdf [file 6d1ba82b0a71e3db1f2cda790d3fb108_genetics.114.166272-13.pdf]

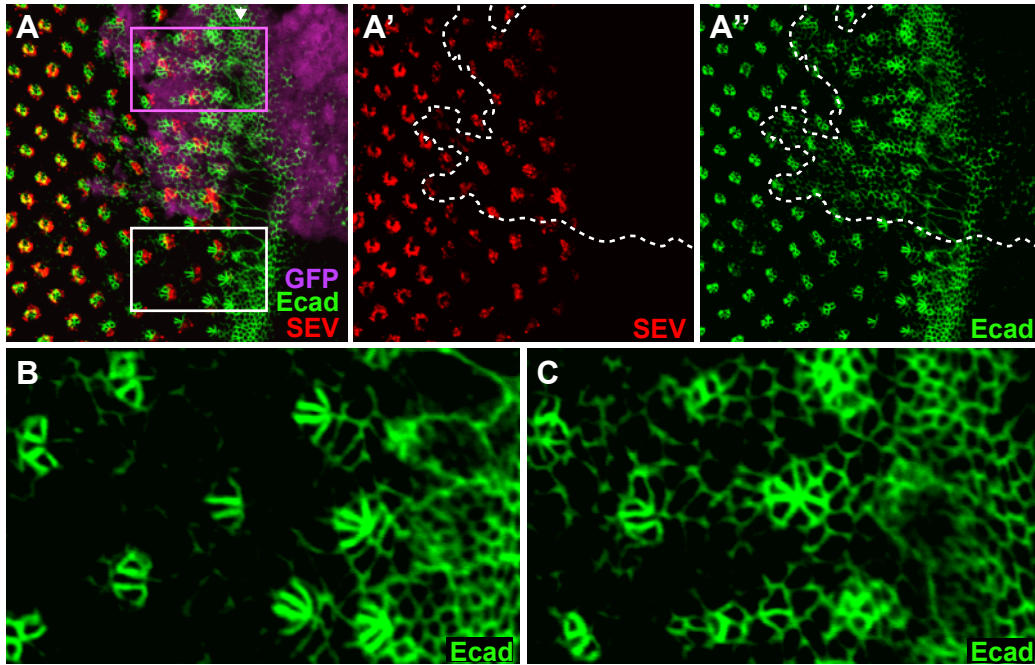

**Figure S14** Rap1<sup>V12</sup> does not alter SEV expression, but perturbs ommatidial cluster assembly. (A-A'') Random clones (GFP-positive cells) expressing Rap1<sup>V12</sup> in third instar eye discs were induced by heat shock using the FLP-out/Gal4 system. Tissues were then immunostained with anti-SEV and anti-Ecad antibodies. Dotted line in (A'-A'') marks the Rap1<sup>V12</sup>-expressing clonal area. The white and magenta boxes in (A) encompass control and Rap1<sup>V12</sup>-expressing areas that are respectively shown enlarged in (B) and (C). Arrowheads denote the position of the morphogenetic furrow. Anterior is to the right.
