# Supplementary material
Source: PubMed Central journal article supplement (PMC4125397)
Supplement: 8bbe07f32e5a7d11ff767a403d4208bf_genetics.114.166272-3.pdf [file 8bbe07f32e5a7d11ff767a403d4208bf_genetics.114.166272-3.pdf]

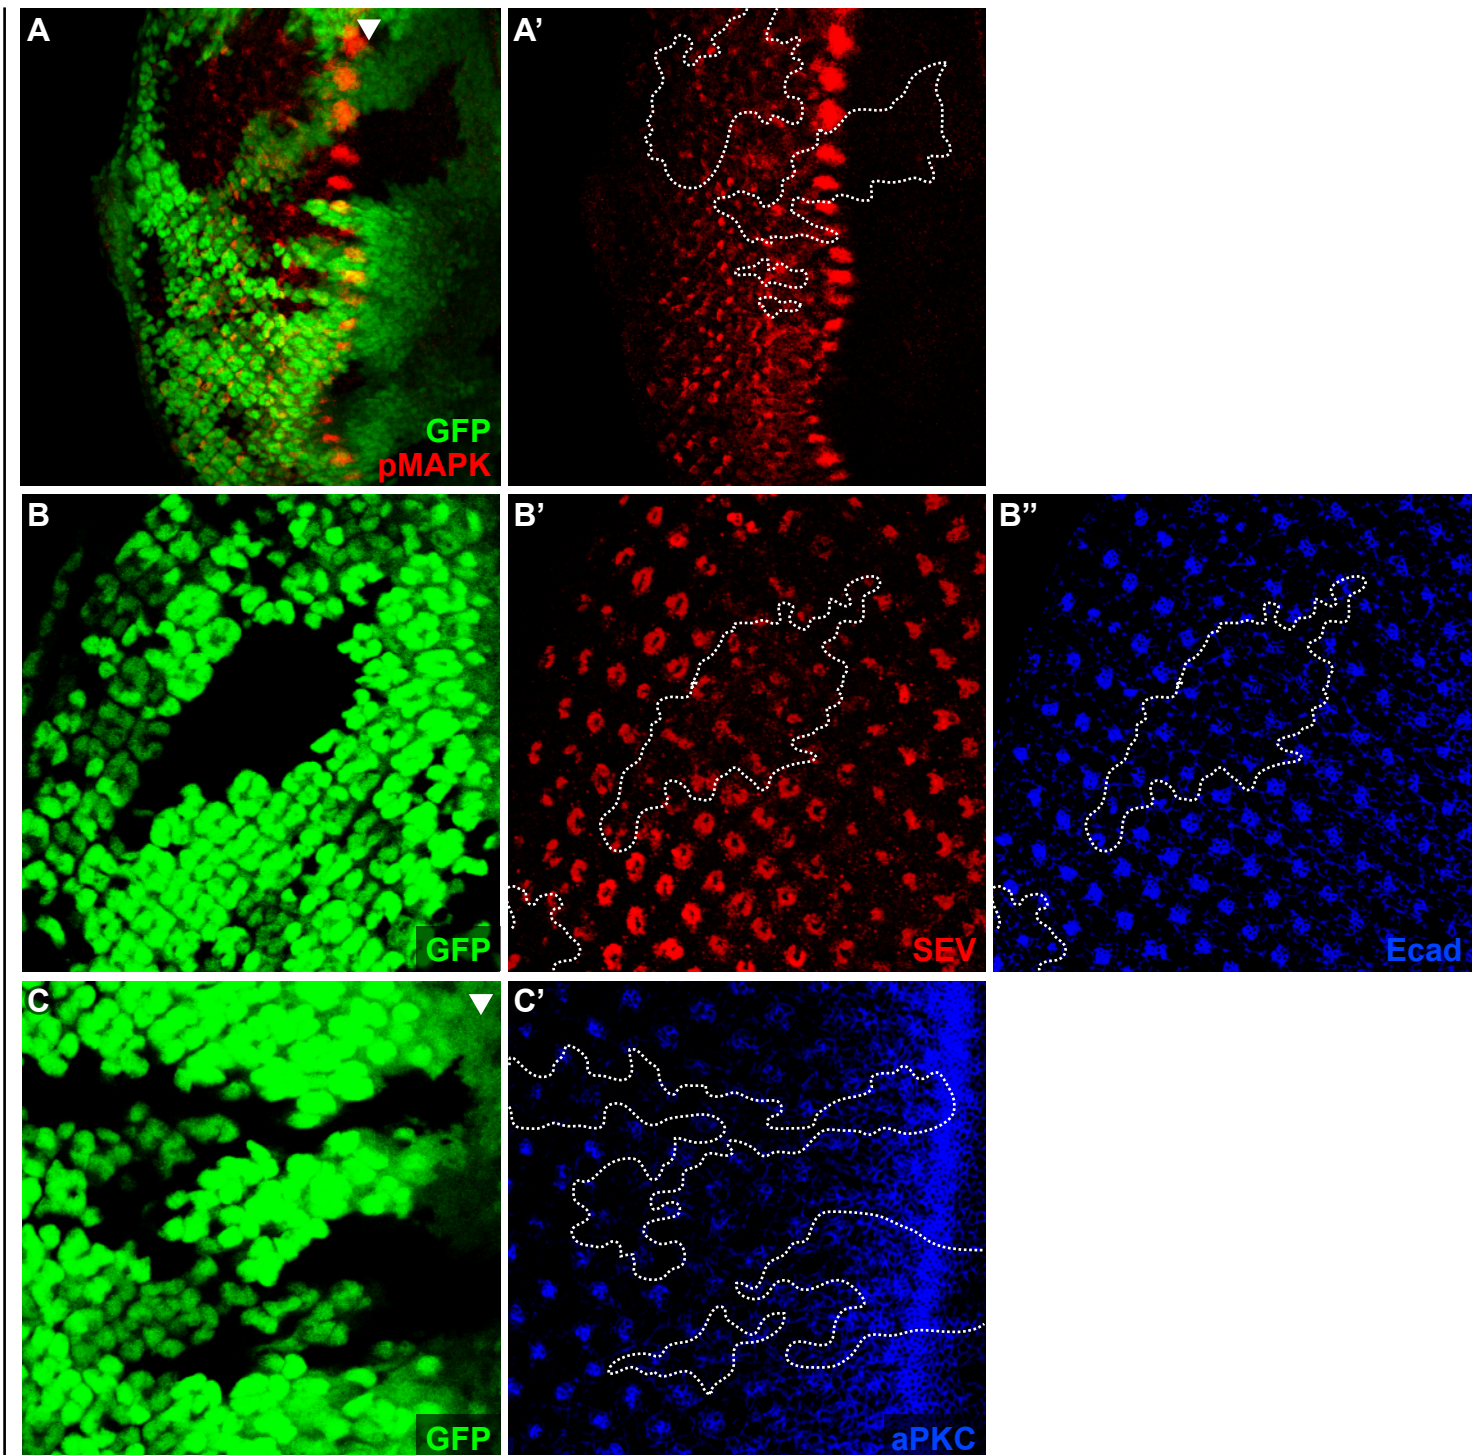

**Figure S7** Clonal analysis of *PDZ-GEF<sup>E-696</sup>* null allele confirms results obtained with *PDZ-GEF* dsRNA in third instar eye discs. (A-A' to C-C'') Random homozygous clones (GFP-negative cells) for the *PDZ-GEF<sup>E-696</sup>* allele in third instar eye discs were induced using the FLP/FRT system. Eye discs were then immunostained with (A') anti-pMAPK, (B') anti-SEV, (B'') anti-Ecad, and (C') anti-aPKC antibodies. Loss of PDZ-GEF activity does not impede pMAPK levels in cells close to the morphogenetic furrow (A'), but reduces pMAPK levels in posterior areas corresponding to the R7 differentiation region, wherein SEV activity is required. Arrowheads mark the position of the morphogenetic furrow. Anterior is to the right.
