# Supplementary material
Source: PubMed Central journal article supplement (PMC4125397)
Supplement: 29ed48b857f4c5bbbdc35f0e5856d2ea_genetics.114.166272-10.pdf [file 29ed48b857f4c5bbbdc35f0e5856d2ea_genetics.114.166272-10.pdf]

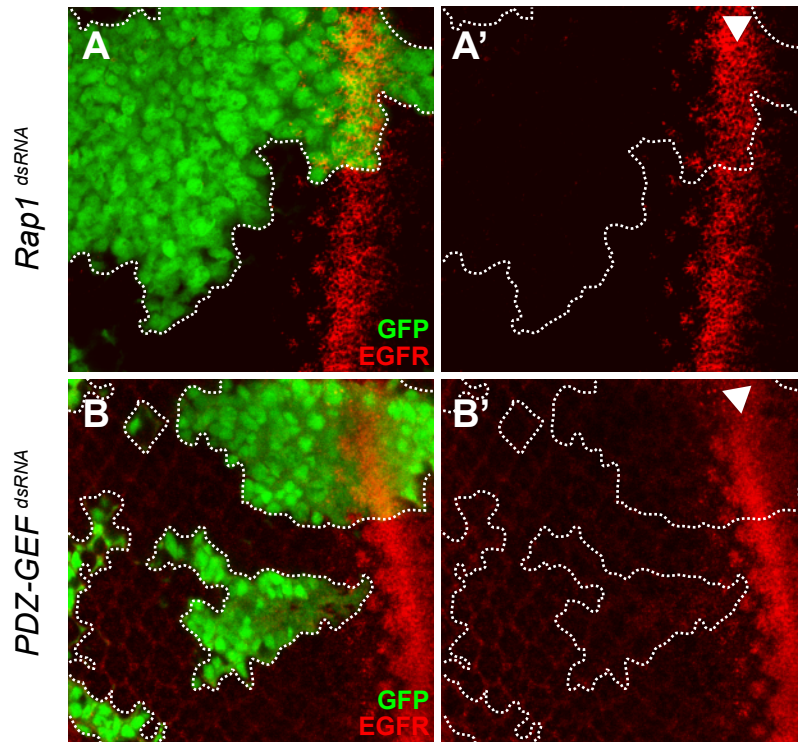

**Figure S12** Reduction of Rap1 activity during eye development does not alter Egrf expression pattern. (A-A') Rap1 dsRNA or (B-B') PDZ-GEF dsRNA were clonally expressed (marked by GFP) in the third instar eye discs using the FLP-out Gal4 system. Discs were then stained with an anti-Egfr antibody. The arrowhead refers to the position of the morphogenetic furrow. Anterior is to the right.
