# Supplementary material
Source: PubMed Central journal article supplement (PMC4125397)
Supplement: 63c4e267d7e1ebfb017d4ce45bb01f58_genetics.114.166272-7.pdf [file 63c4e267d7e1ebfb017d4ce45bb01f58_genetics.114.166272-7.pdf]

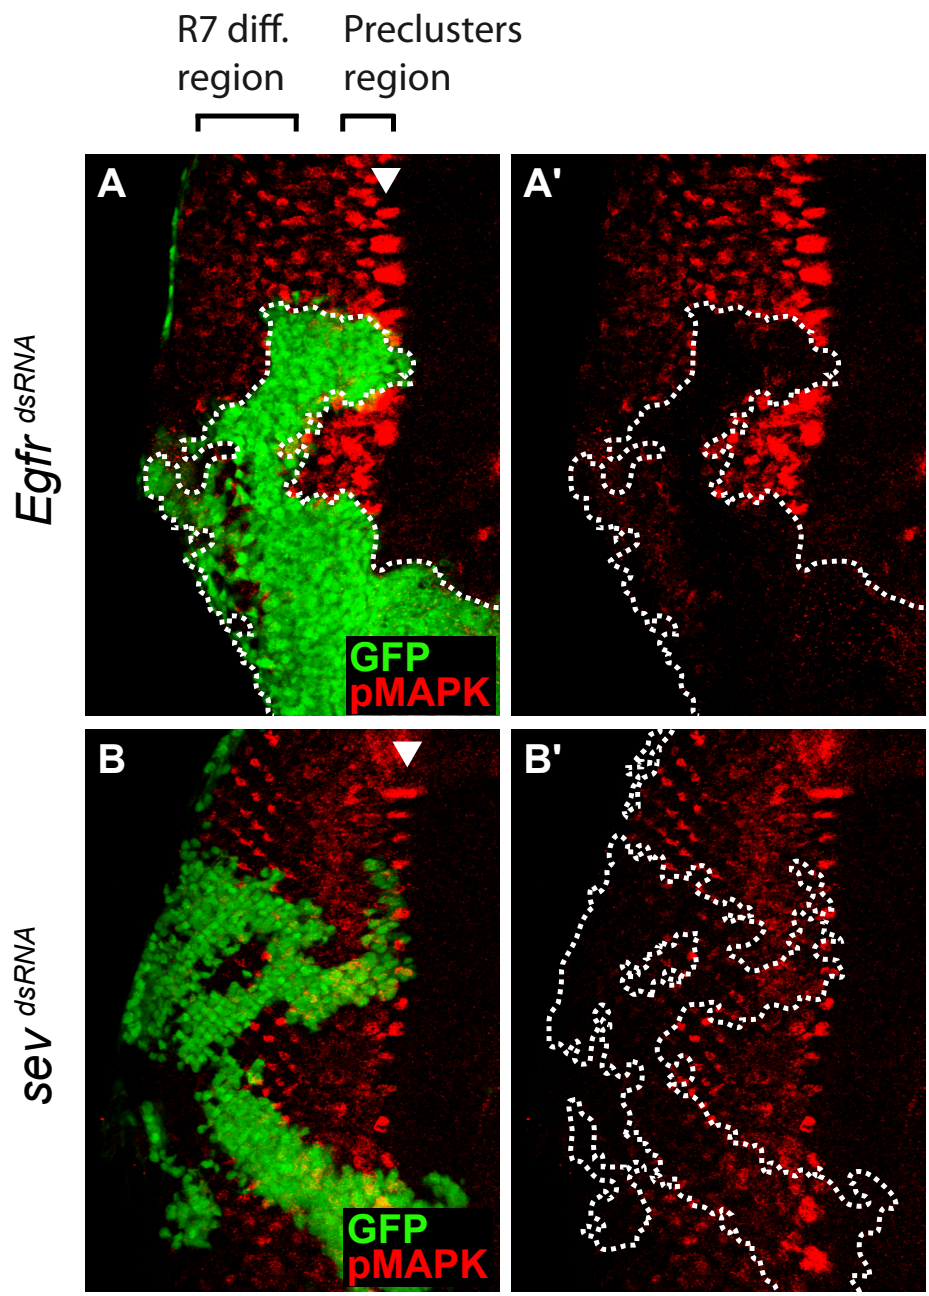

**Figure S5** Comparison of the eye disc areas controlled by EGFR and SEV leading to MAPK activation. (A-A' and B-B') Random clones (GFP positive cells) expressing the indicated dsRNAs were induced using the FLP-out Gal4 system and phosphorylated MAPK (pMAPK) was monitored by immunofluorescence in third instar larval eye discs. Arrowheads refer to the position of the morphogenetic furrow. Anterior is to the right.
