# Supplementary material
Source: PubMed Central journal article supplement (PMC4125397)
Supplement: 80a8a0f60a944bae68abb05057e6045e_genetics.114.166272-2.pdf [file 80a8a0f60a944bae68abb05057e6045e_genetics.114.166272-2.pdf]

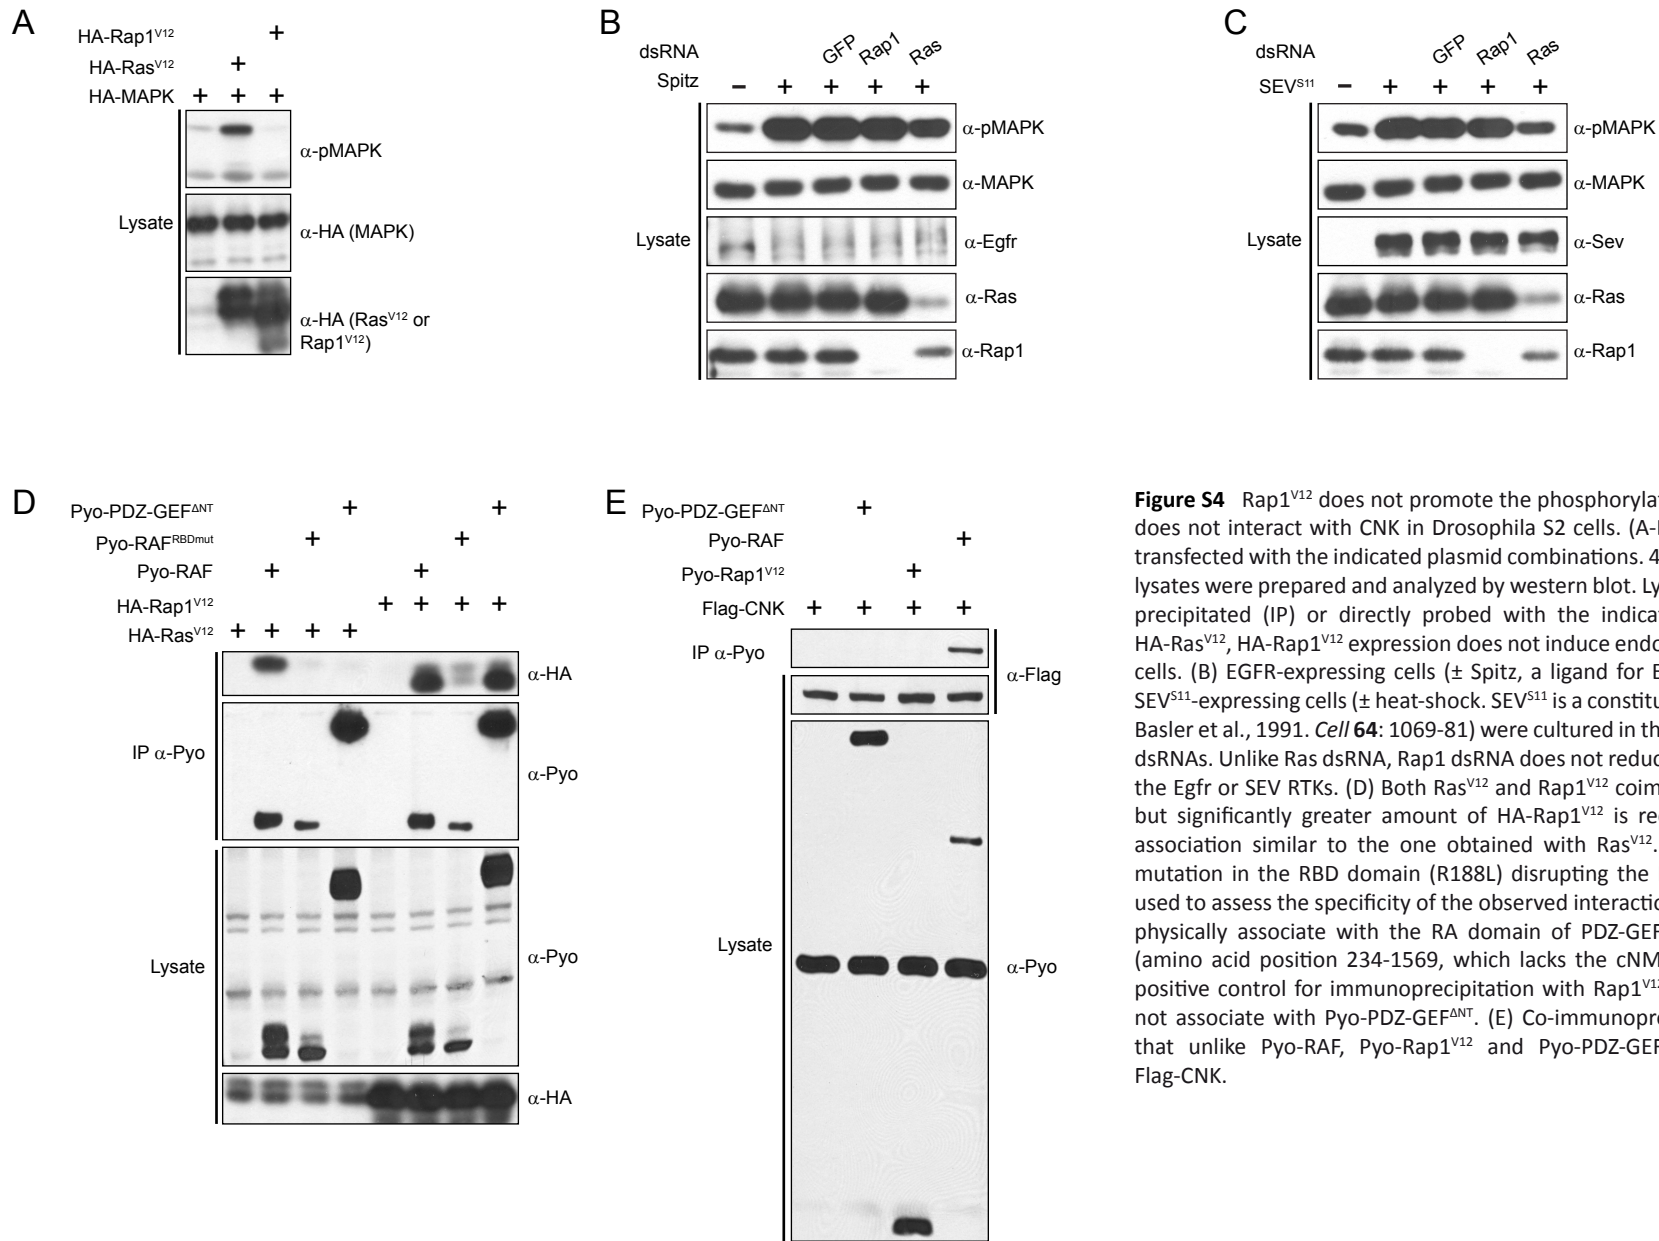

**Figure S4** Rap1<sup>V12</sup> does not promote the phosphorylation of MAPK (pMAPK) and does not interact with CNK in *Drosophila* S2 cells. (A-E) S2 cells were transiently transfected with the indicated plasmid combinations. 48 hrs post-transfection, cell lysates were prepared and analyzed by western blot. Lysates were either immunoprecipitated (IP) or directly probed with the indicated antibodies. (A) Unlike HA-Ras<sup>V12</sup>, HA-Rap1<sup>V12</sup> expression does not induce endogenous pMAPK levels in S2 cells. (B) EGFR-expressing cells ( $\pm$  Spitz, a ligand for EGFR) or (C) heat-inducible SEV<sup>S11</sup>-expressing cells ( $\pm$  heat-shock. SEV<sup>S11</sup> is a constitutively active variant of SEV; Basler et al., 1991. *Cell* **64**: 1069-81) were cultured in the presence of the indicated dsRNAs. Unlike Ras dsRNA, Rap1 dsRNA does not reduce pMAPK levels induced by the Egfr or SEV RTKs. (D) Both Ras<sup>V12</sup> and Rap1<sup>V12</sup> coimmunoprecipitate with RAF, but significantly greater amount of HA-Rap1<sup>V12</sup> is required to reach a level of association similar to the one obtained with Ras<sup>V12</sup>. RAF<sup>RBDmut</sup> harbors a point mutation in the RBD domain (R188L) disrupting the Ras-RAF association and is used to assess the specificity of the observed interactions. Since Rap1 is known to physically associate with the RA domain of PDZ-GEF, we used Pyo-PDZ-GEF<sup>ΔNT</sup> (amino acid position 234-1569, which lacks the cNMP domain; Figure 2F) as a positive control for immunoprecipitation with Rap1<sup>V12</sup>. Interestingly, Ras<sup>V12</sup> does not associate with Pyo-PDZ-GEF<sup>ΔNT</sup>. (E) Co-immunoprecipitation assays revealed that unlike Pyo-RAF, Pyo-Rap1<sup>V12</sup> and Pyo-PDZ-GEF<sup>ΔNT</sup> fail to associate with Flag-CNK.
