# Supplementary material
Source: PubMed Central journal article supplement (PMC4125397)
Supplement: 1364fc41939775740a089b85e1ca8f70_genetics.114.166272-8.pdf [file 1364fc41939775740a089b85e1ca8f70_genetics.114.166272-8.pdf]

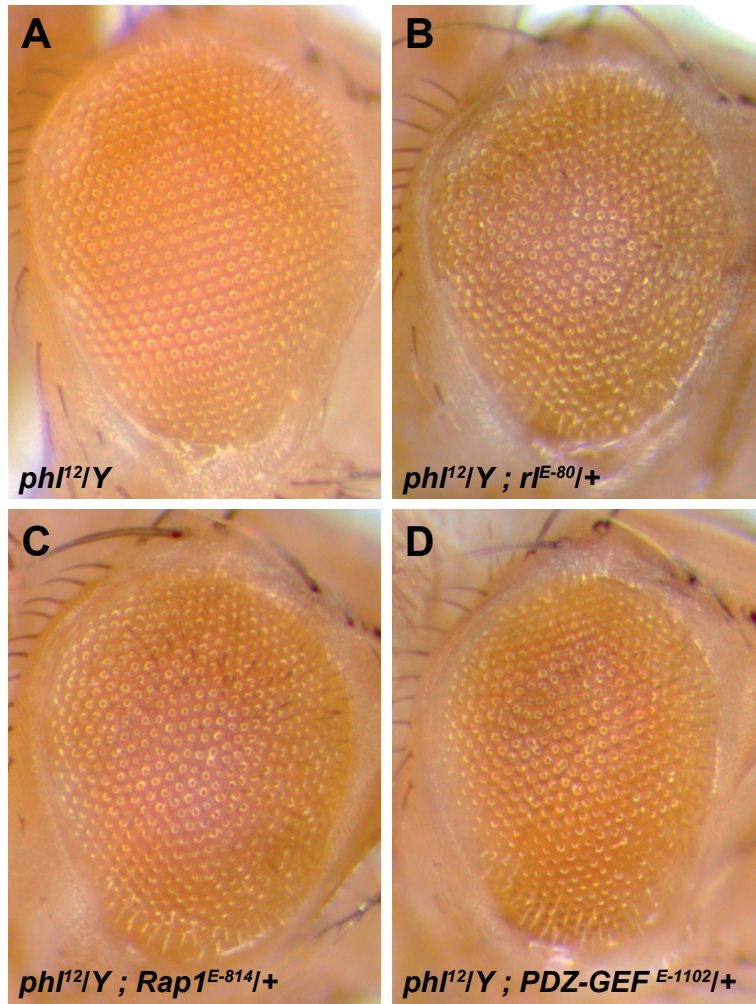

**Figure S1** *Rap1* and *PDZ-GEF* alleles genetically interact with a hypomorphic allele of *raf* (*phl<sup>12</sup>*). (A-D) Micrographs of adult eyes of the indicated genotypes. A *rolled* (*rl*) loss-of-function allele (B) was used as reference for enhanced eye roughness. Anterior is to the right.
