# Supplementary material
Source: PubMed Central journal article supplement (PMC4125397)
Supplement: 8099ce7a86e4382736e88768d9a1e035_genetics.114.166272-9.pdf [file 8099ce7a86e4382736e88768d9a1e035_genetics.114.166272-9.pdf]

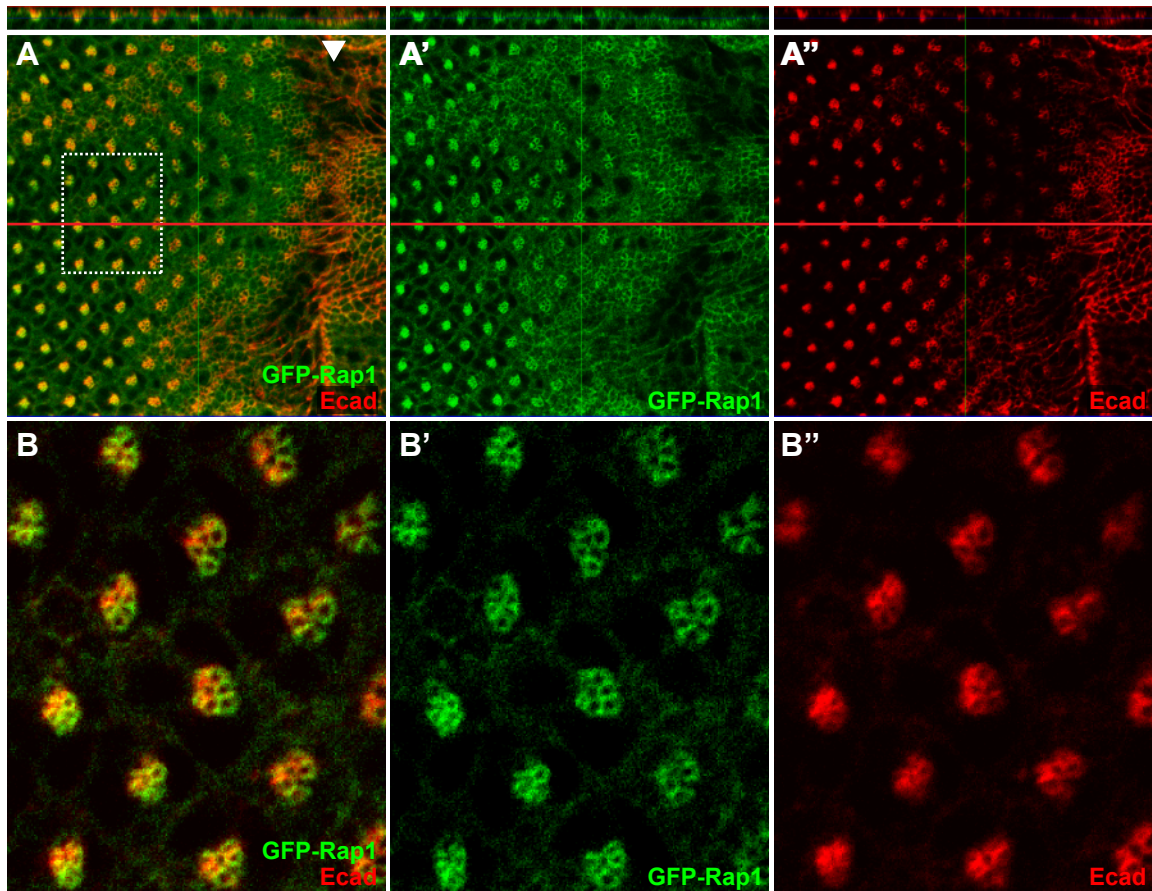

**Figure S8** Expression pattern and apical subcellular localization in third instar eye disc of *GFP-Rap1* under the endogenous *Rap1* promoter. (A-A'') *GFP-Rap1* accumulates at adherens junctions of developing ommatidia as revealed by co-localization with E-cadherin (Ecad) staining. The red line across each panel corresponds to the position of the optical cross-section shown at the top. (B-B'') Higher magnification of the boxed area shown in (A). Arrowheads denote the position of the morphogenetic furrow. Anterior is to the right.
