# Supplementary material
Source: PubMed Central journal article supplement (PMC4125397)
Supplement: 9796accc655cb4558b5f24a4bef41d5a_genetics.114.166272-11.pdf [file 9796accc655cb4558b5f24a4bef41d5a_genetics.114.166272-11.pdf]

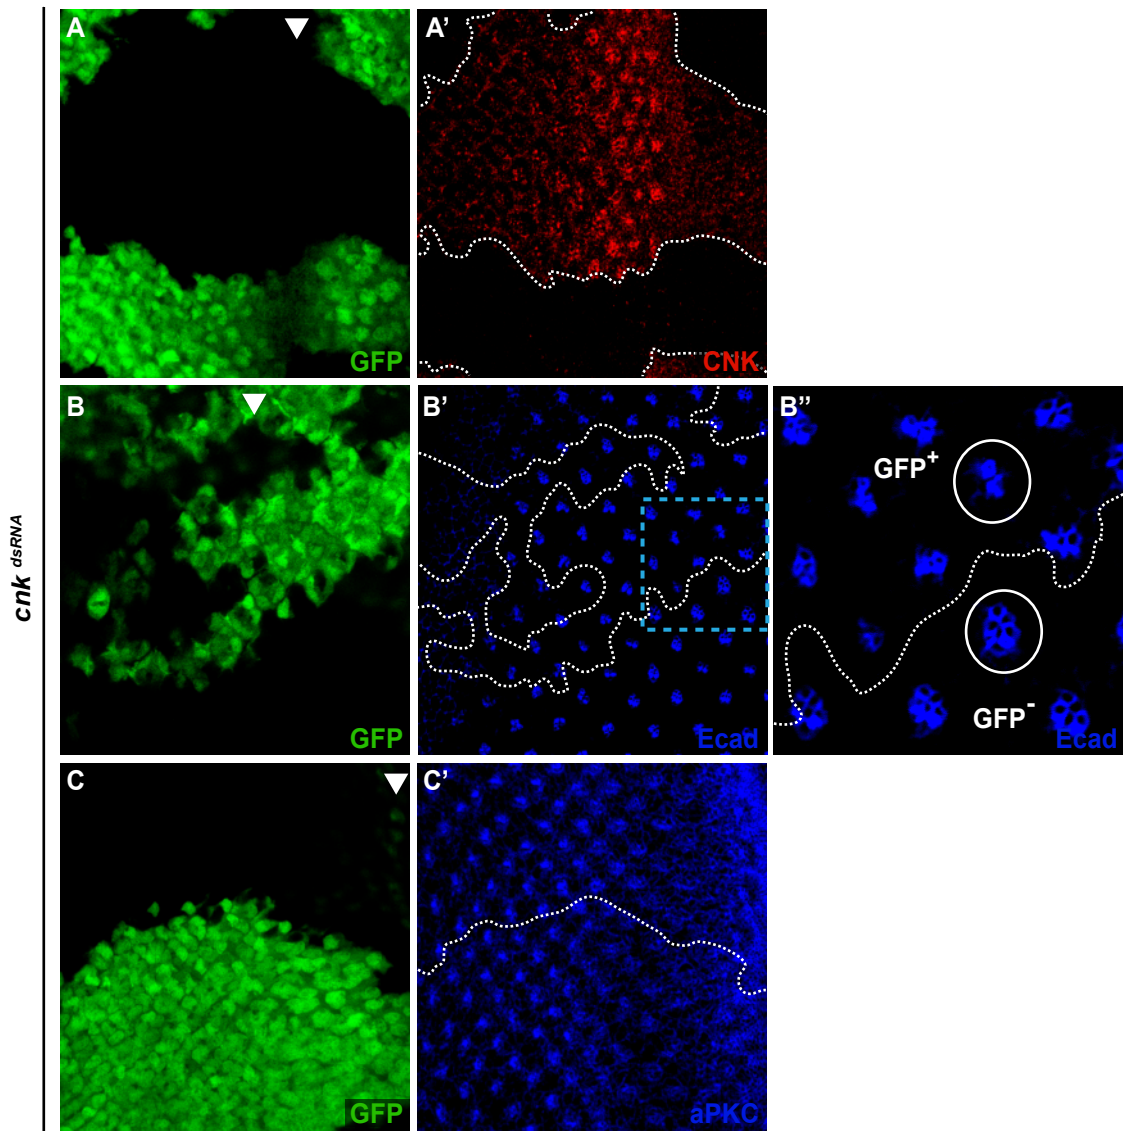

**Figure S11** Knockdown of CNK in third instar larval eye discs has no impact on the level of adherens junction or apical domain markers per individual ommatidial cell. (A-A' to C-C') Random clones (GFP-positive cells) expressing *cnk* dsRNA in third instar eye discs were induced using the FLP-out / Gal4 system. Eye discs were then immunostained with (A') anti-CNK, (B' and B'') anti-Ecad; or (C') anti-aPKC antibodies. B'' corresponds to the boxed area shown in B'. Because CNK depletion impedes cell differentiation, less cells join ommatidial clusters and as a result reduces the overall area that normally stains positive for Ecad in each ommatidium. Circles in B'' highlight typical examples of the size difference between ommatidial clusters expressing (GFP+) or not (GFP-) *cnk* dsRNAs. However, Ecad or aPKC levels per cell in differentiating *cnk* dsRNA-expressing cells do not appear to be reduced compared to control cells. Arrowheads denote the position of the morphogenetic furrow. Anterior is to the right.
