# Supplementary material
Source: PubMed Central journal article supplement (PMC4125397)
Supplement: aabe54d58b1d777ed1a18f5ec7d0fa95_genetics.114.166272-12.pdf [file aabe54d58b1d777ed1a18f5ec7d0fa95_genetics.114.166272-12.pdf]

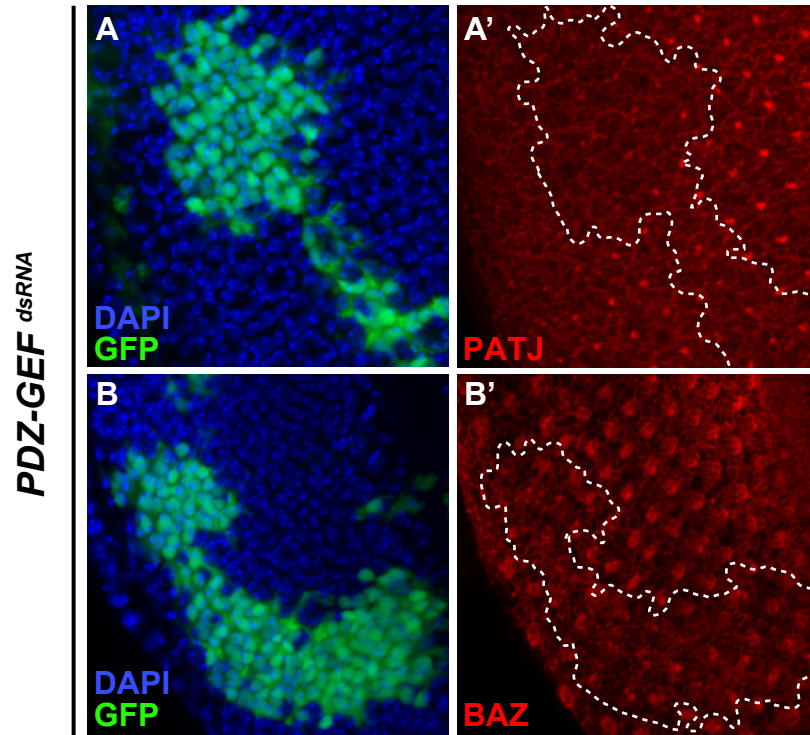

**Figure S10** Knockdown of PDZ-GEF during eye development impairs apical localization of PATJ and Bazooka. Random clones (GFP-positive cells) expressing *PDZ-GEF* dsRNA were induced using the FLP-out / Gal4 system. Eye discs were then immunostained with (A') anti-PATJ or (B') anti-Bazooka. Anterior is to the right.
