# Supplementary material
Source: PubMed Central journal article supplement (PMC4125397)
Supplement: b7622006a9768301ed144d09298c096e_genetics.114.166272-14.pdf [file b7622006a9768301ed144d09298c096e_genetics.114.166272-14.pdf]

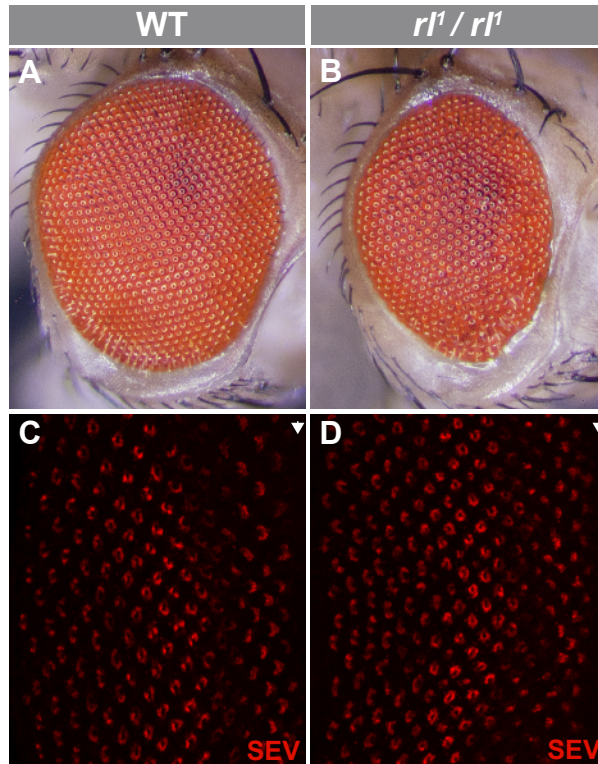

**Figure S13** Reduction of MAPK activity does not alter SEV levels. Adult fly retinæ (A-B) or third instar eye discs stained using an anti-SEV antibody (C-D) are shown. Compared to WT (A-C), the homozygous *rolled<sup>1</sup>* (*rl<sup>1</sup>*) mutation (B-D) causes eye roughness owing to the loss ommatidial cells, but does not modify SEV levels or expression pattern. Arrowheads mark the position of the morphogenetic furrow. Anterior is to the right.
