# Supplementary material
Source: PubMed Central journal article supplement (PMC4125397)
Supplement: e1665b142a737356723d515e84cc5181_genetics.114.166272-15.pdf [file e1665b142a737356723d515e84cc5181_genetics.114.166272-15.pdf]

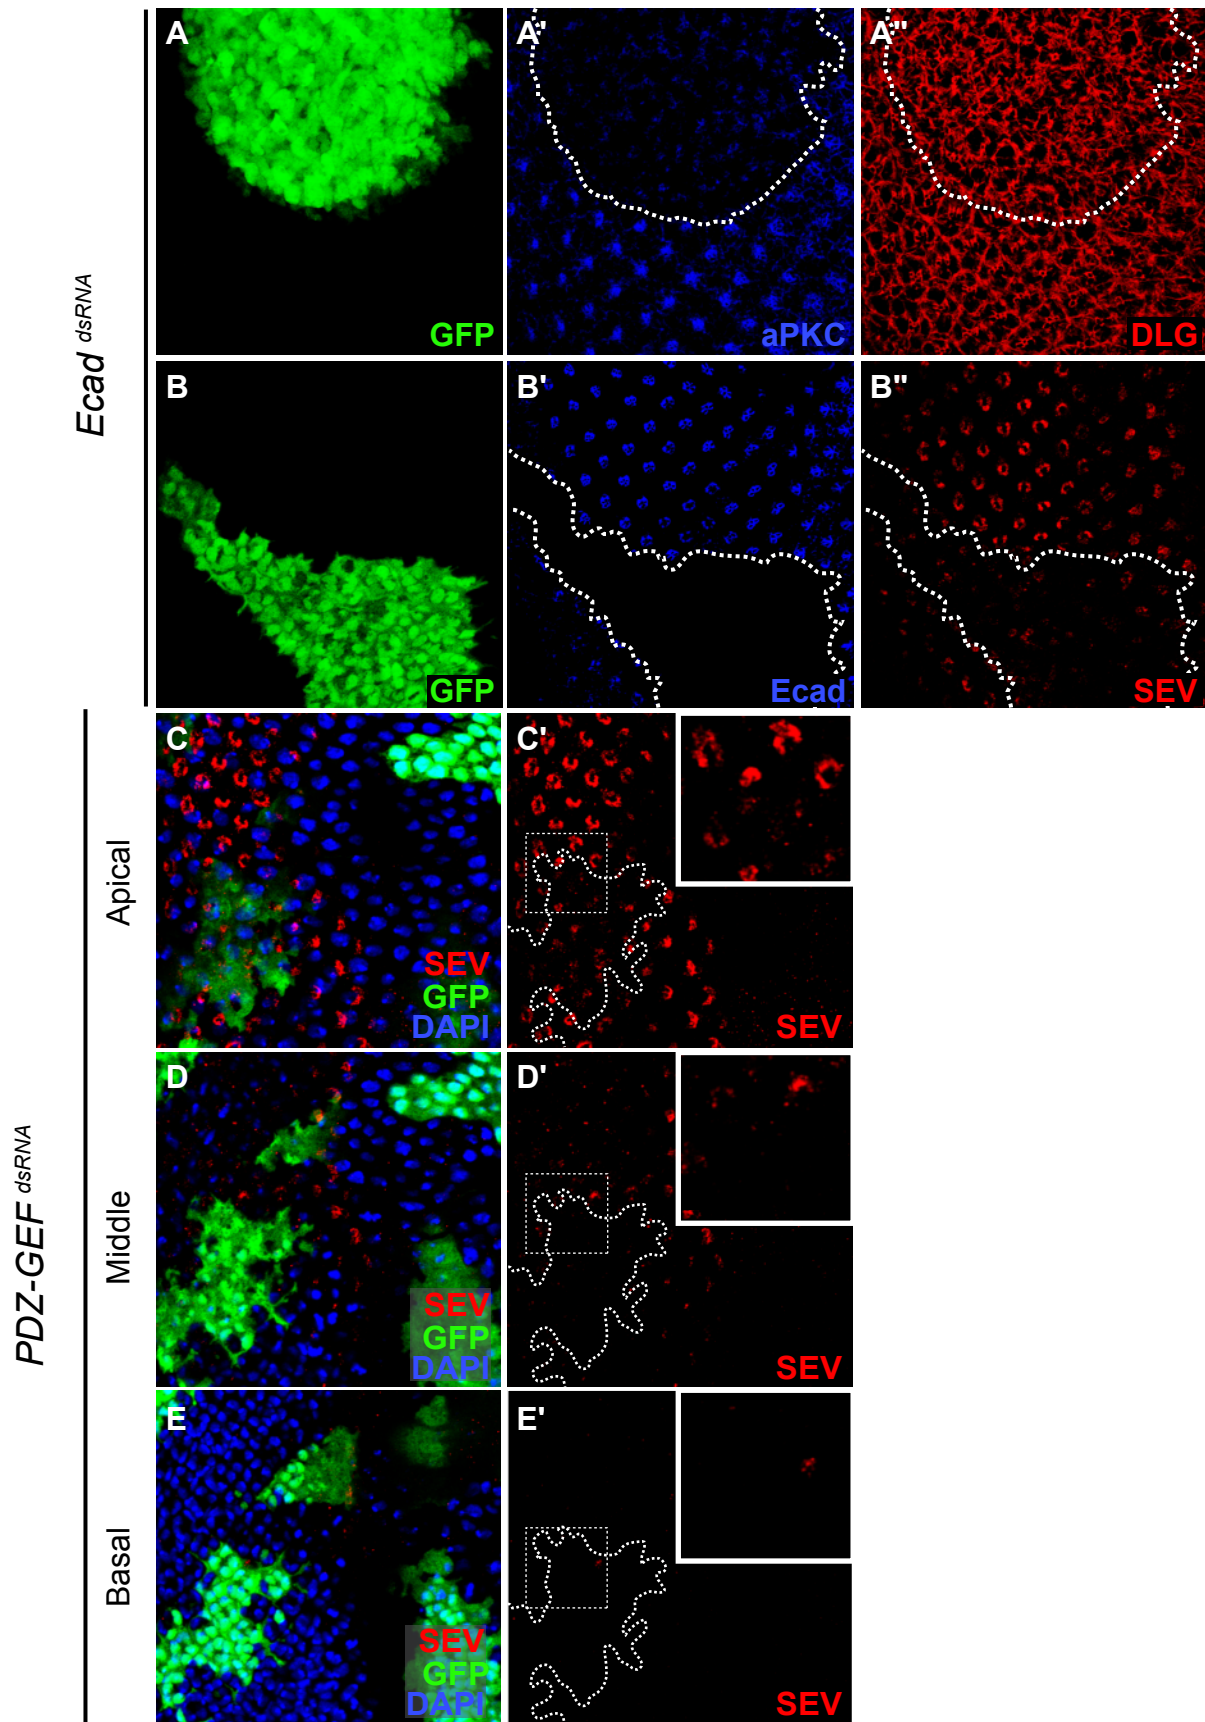

**Figure S9** *Ecad* dsRNA phenocopies the loss of Rap1 activity by impairing aPKC and SEV levels in third instar eye discs. (A-A'' to E-E') Random clones (GFP-positive cells) expressing the indicated dsRNAs in third instar larval eye discs were induced using the FLP-out / Gal4 system. Eye discs were then immunostained with (A') anti-aPKC, (A'') anti-DLG, (B') anti-Ecad, and (B'', C'-E') anti-SEV antibodies. The loss of Rap1 signaling, as exemplified by depleting PDZ-GEF levels (C-E), reduces SEV levels that normally populate the apical domain and does not lead to a relocalization of SEV to basolateral membranes. The boxed areas in (C'-E') are shown enlarged at the top right corner of each panel. Anterior is to the right.
